# Supplementary figures and images for: Accentuated transdermal application of glucosamine sulphate attenuates experimental osteoarthritis induced by monosodium iodoacetate
Source: Royal Society of Chemistry journal article supplement (doi:10.1039/c6tb00327c), 2016-01-01

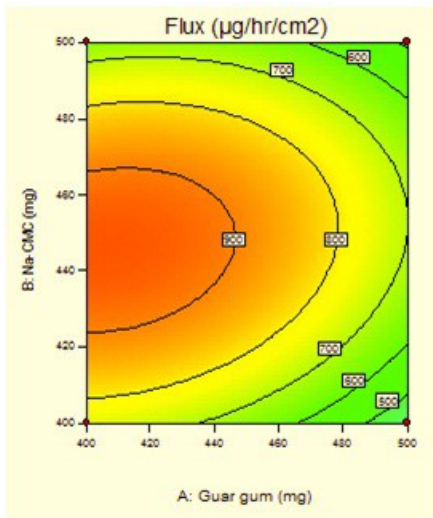

Supplement: c6tb00327c2.pdf [file c6tb00327c2.pdf]

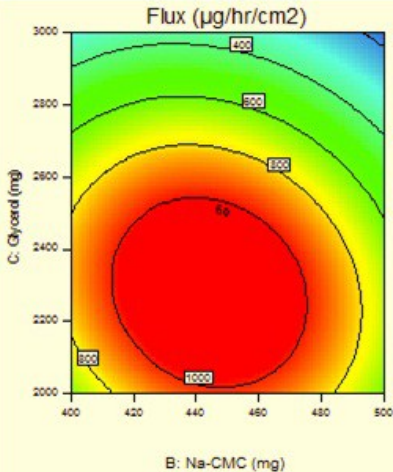

Supplement: c6tb00327c4.pdf [file c6tb00327c4.pdf]
